# Supplementary material
Source: MDPI journal article supplement (https://www.mdpi.com/2297-8739/8/10/186)
Supplement: s1 [file s1]

**The Separation and Purification of Ellagic Acid from *Phyllanthus urinaria* L. by a Combined Mechanochemical-Macroporous Resin Adsorption Method**

Zili Guo, Shuting Xiong, Yuanyuan Xie and Xianrui Liang \*

Collaborative Innovation Center of Yangtze River Delta Region Green Pharmaceuticals,  
College of Pharmaceutical Sciences, Zhejiang University of Technology, Hangzhou,  
310014, China

**\*Correspondence:** Dr. Xianrui Liang, Collaborative Innovation Center of Yangtze River Delta Region Green Pharmaceuticals, College of Pharmaceutical Sciences, Zhejiang University of Technology, Hangzhou, 310014, China.

Email: liangxrvicky@zjut.edu.cn

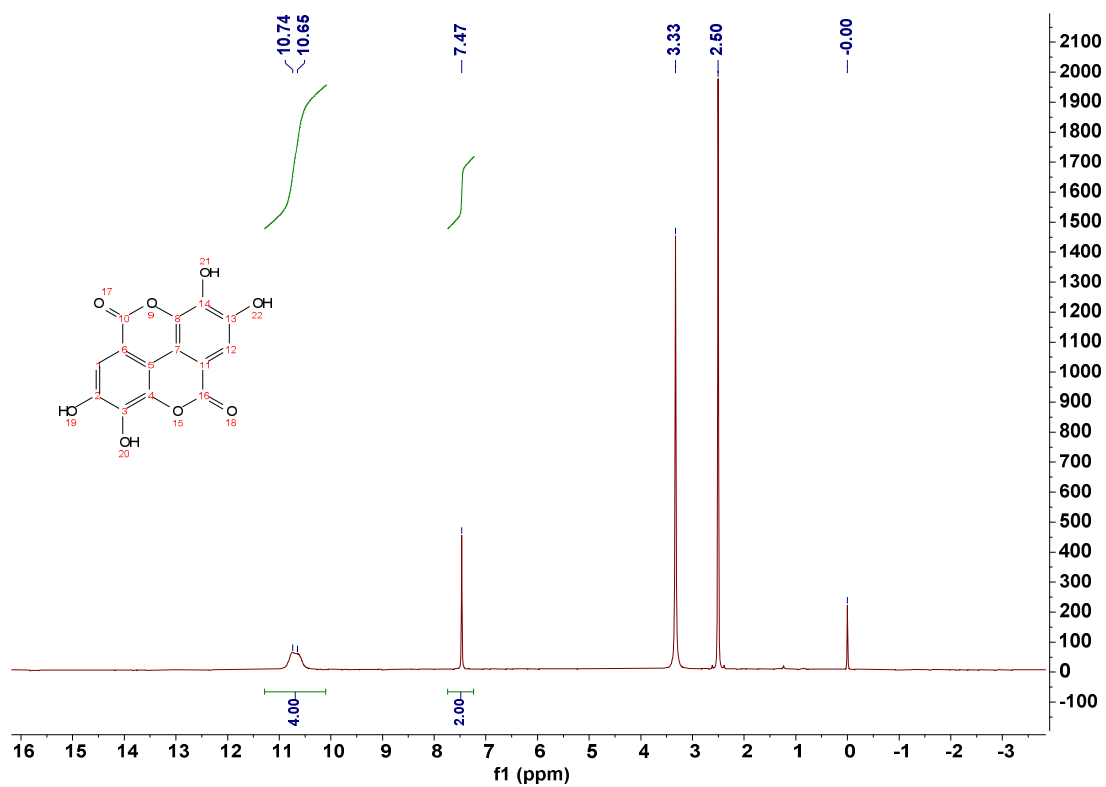

**Figure S1.** The  $^1\text{H}$  NMR spectrum of ellagic acid.

$^1\text{H}$  NMR (600 MHz, DMSO):  $\delta$  10.70 (br, 4H), 7.47 (s, 2H).

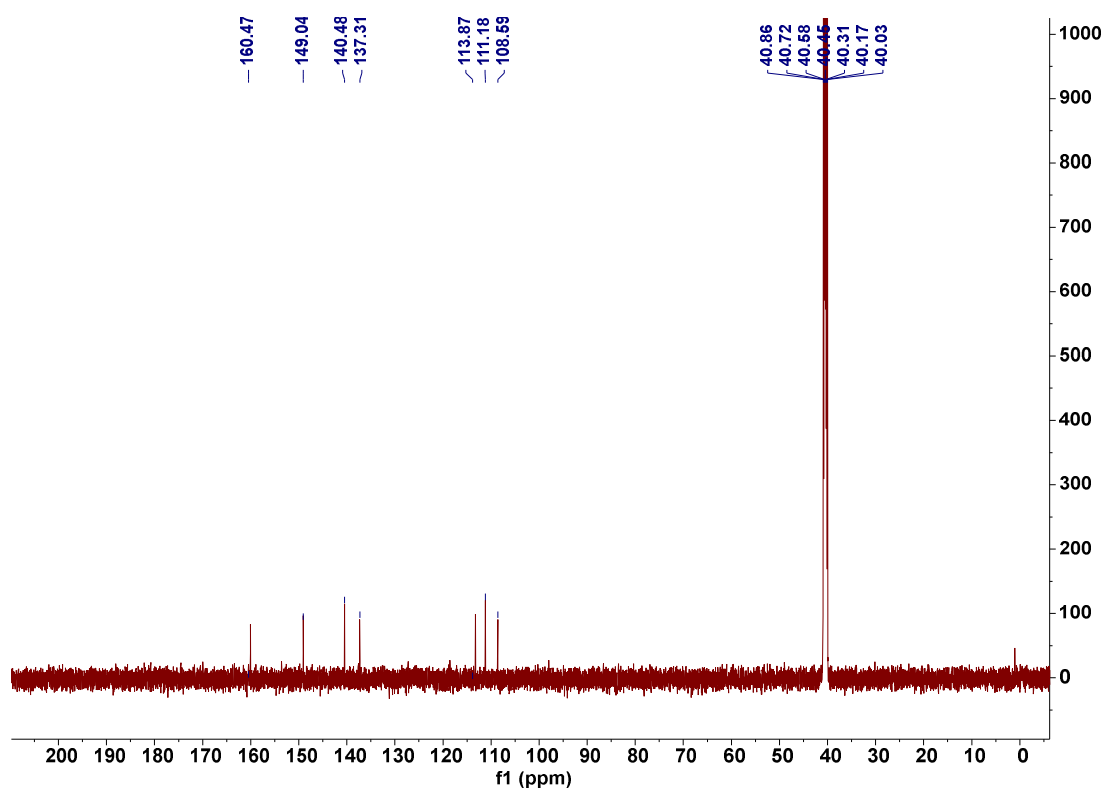

**Figure S2.** The  $^{13}\text{C}$  NMR spectrum of ellagic acid.

$^{13}\text{C}$  NMR (151 MHz, DMSO):  $\delta$  160.47, 149.04, 140.48, 137.31, 113.87, 111.18, 108.59.

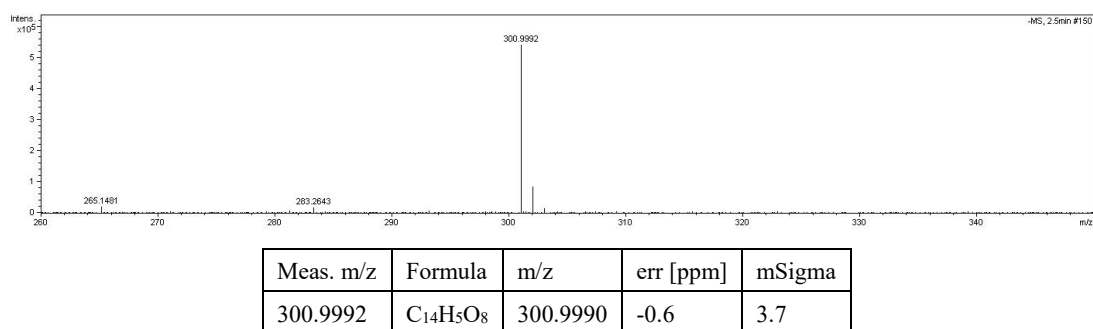

**Figure S3.** The MS spectrum of ellagic acid.

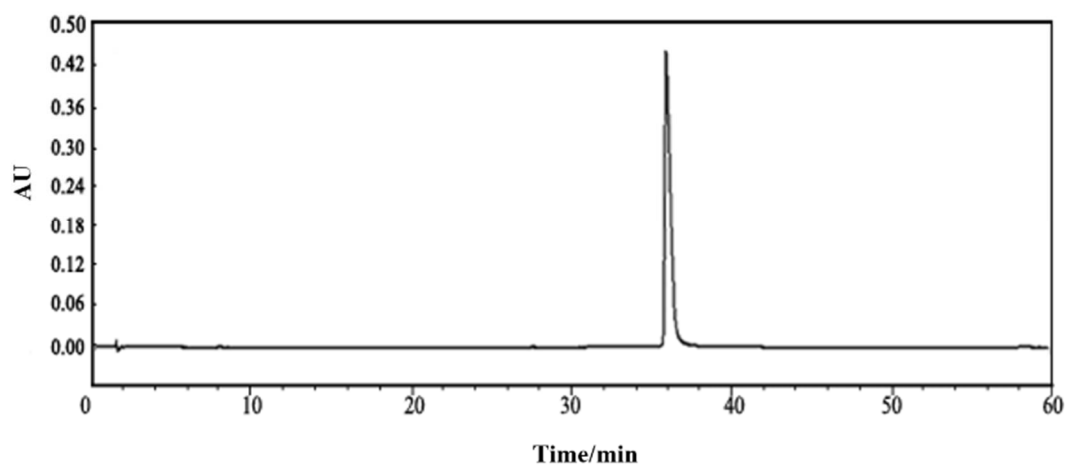

**Figure S4.** UPLC chromatogram of ellagic acid.

**Table S1.** Calibration curves, linear ranges, LODs, LOQs, precision, repeatability, stability and recovery of 5 standards compounds.

| Compounds              | Corilagin                                | Geraniin                                 | Ellagic acid                             |
|------------------------|------------------------------------------|------------------------------------------|------------------------------------------|
| Linear Range (mg/mL)   | 0.033-0.965<br>(R <sup>2</sup> , 0.9999) | 0.068-2.978<br>(R <sup>2</sup> , 0.9989) | 0.010-0.200<br>(R <sup>2</sup> , 0.9998) |
| LOD (µg/mL)            | 1.16                                     | 4.02                                     | 3.08                                     |
| LOQ (µg/mL)            | 4.19                                     | 12.06                                    | 7.69                                     |
| Precision (RSD%)       | 1.28                                     | 0.42                                     | 0.49                                     |
| Repeatability (RSD%)   | 4.67                                     | 6.15                                     | 5.85                                     |
| 12 h-Stability (RSD%)  | 4.83                                     | 3.25                                     | 5.37                                     |
| Mean Recovery % (RSD%) | 93.70 (7.10)                             | 102.30 (5.30)                            | 107.00 (6.10)                            |
